# Supplementary material
Source: publisher figshare collection journal article supplement (https://frontiersin.figshare.com/ndownloader/files/32507144)
Supplement: Supplementary file [file 32507144]

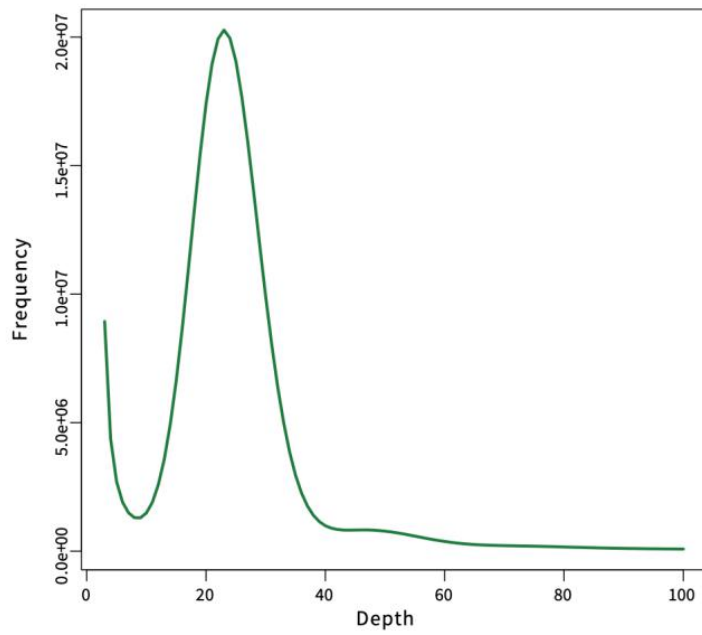

**Figure S1** k-mer distribution of *T. arvense* genome using Illumina reads.

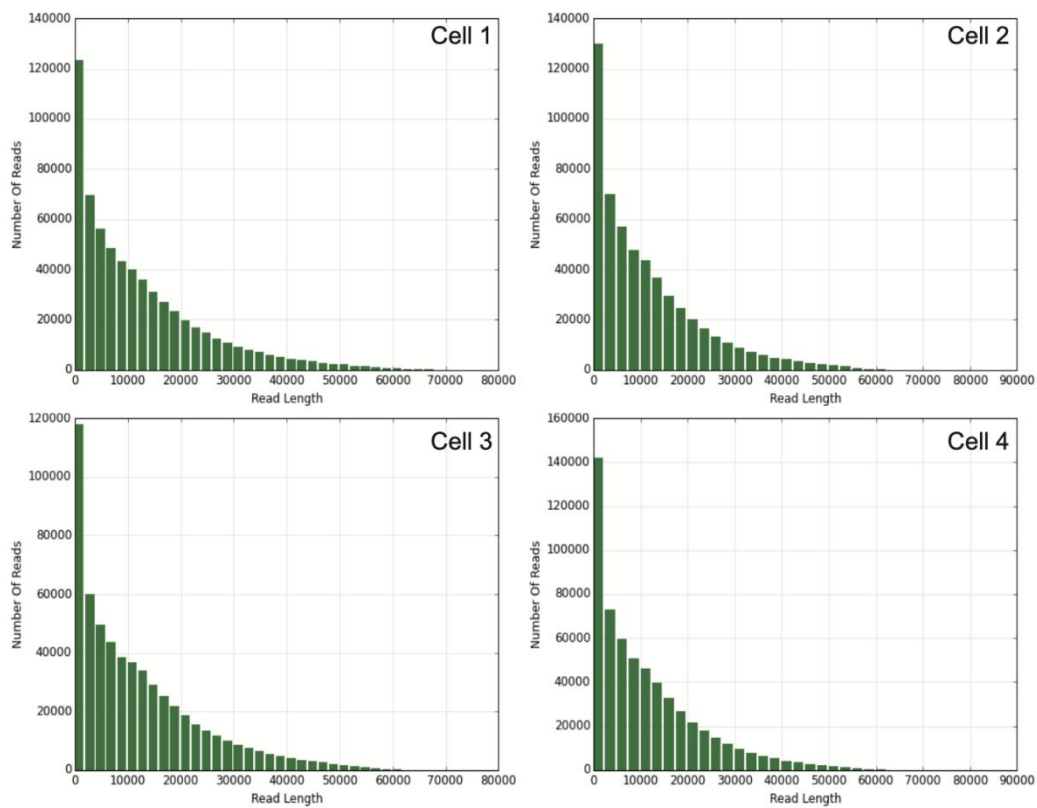

**Figure S2** Length distribution of *T. arvense* genome SMRT sequencing reads from PacBio Sequel platform.

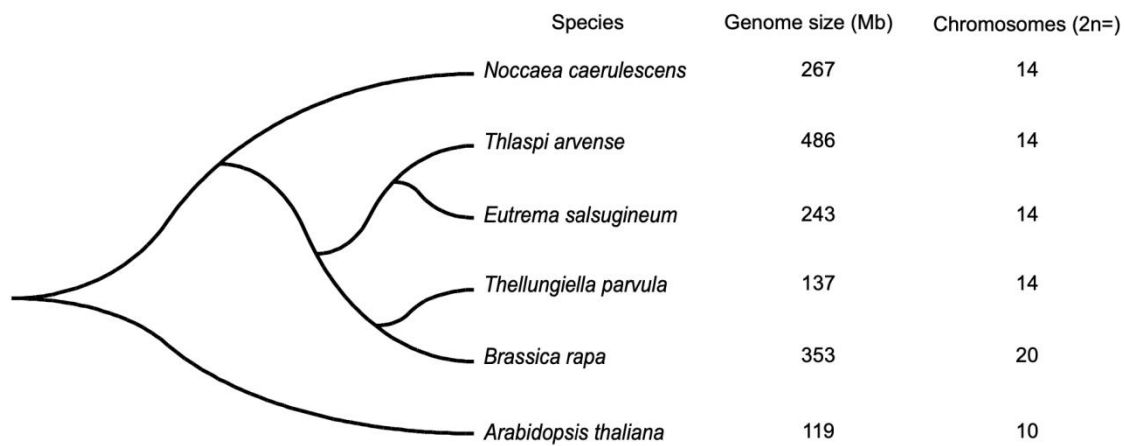

**Figure S3** Genome sizes of close relatives of *T. arvense* in Brassicaceae. The phylogenetic relationship of these Brassicaceae species was cited from Huang et al. (2016).

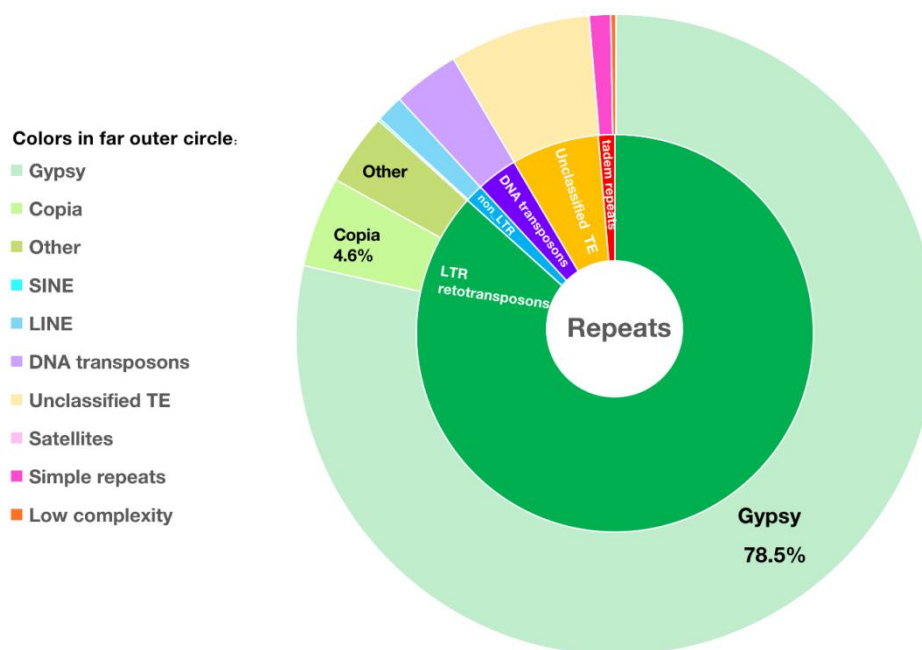

**Figure S4** The proportions of different types of repeats in the *T. arvense* genome.

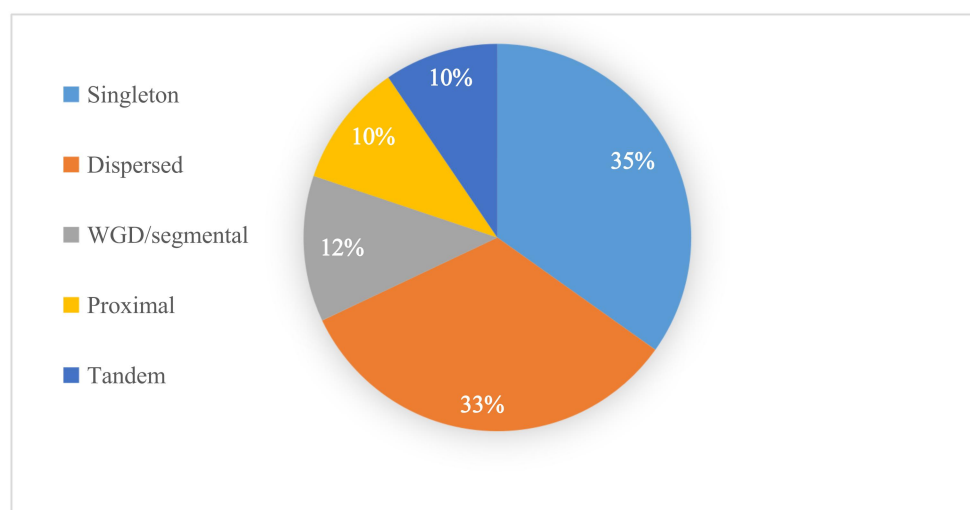

**Figure S5** The proportions of different types of gene duplication in the *T. arvense* genome.

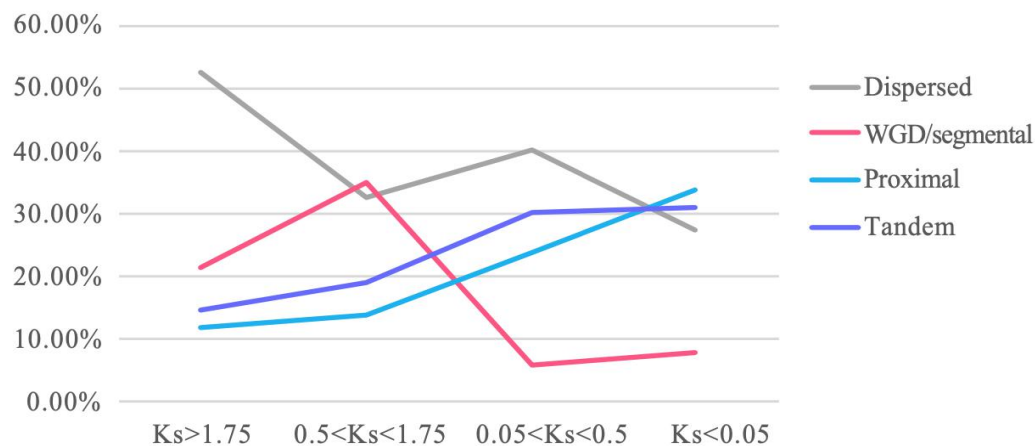

**Figure S6** Changes of the percentage of types of duplicated genes in the *T. arvense* genome over time.

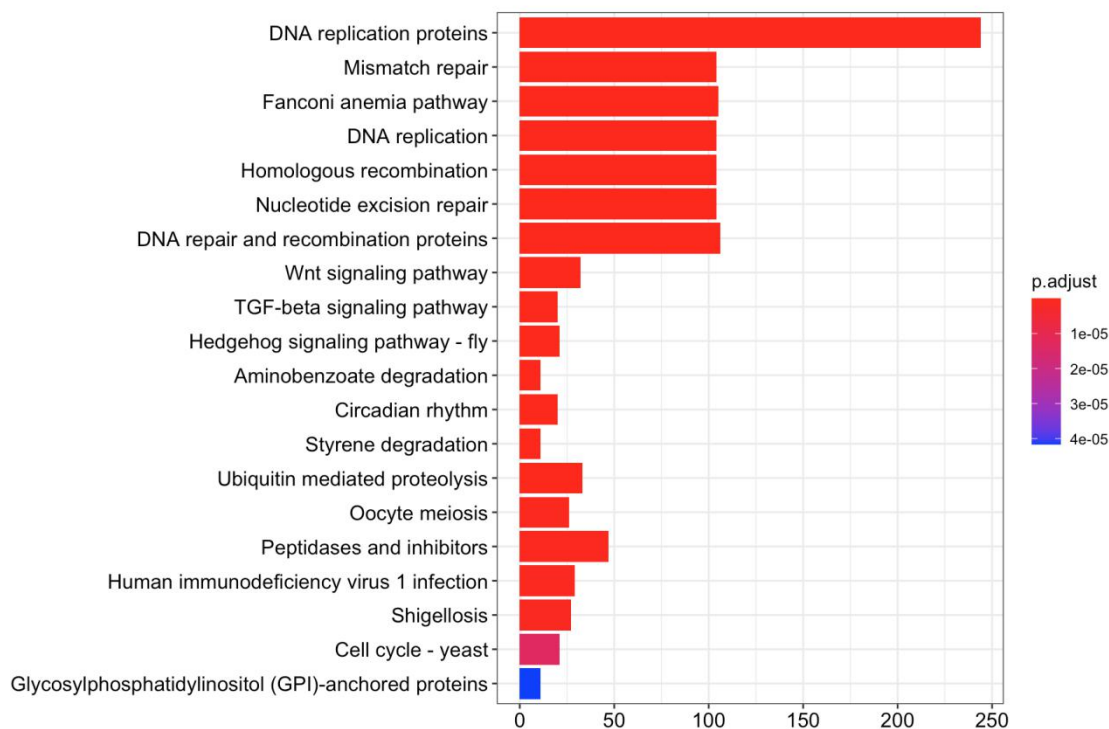

**Figure S7** KEGG annotation enrichment of genes of significantly expanded orthogroups in the *T. arvense* genome.

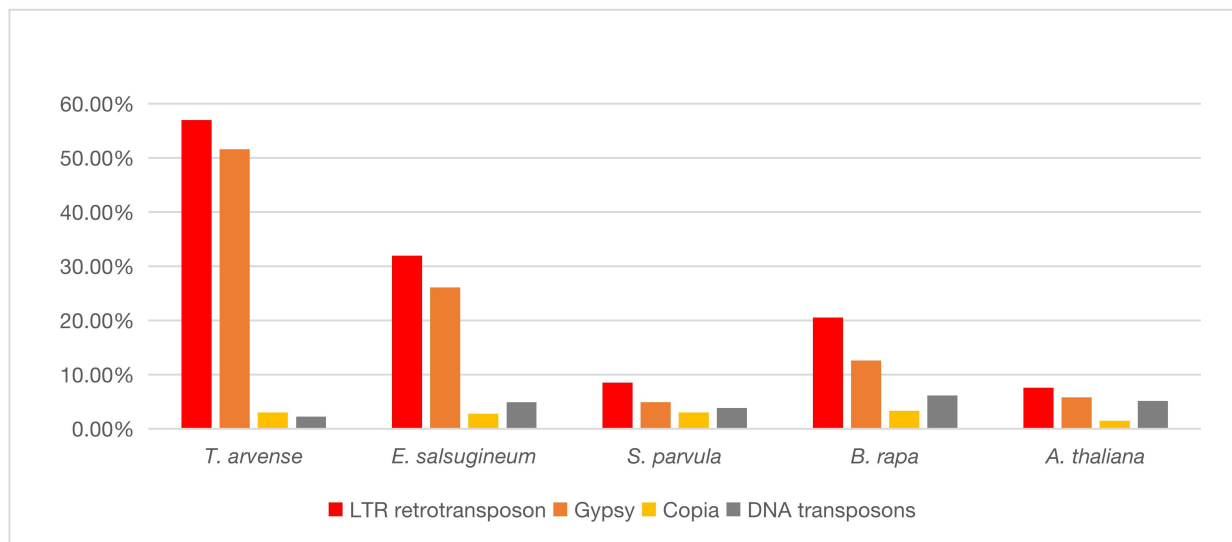

**Figure S8** LTR retrotransposons and DNA transposons percentages of genomes assemblies of five Brassicaceae species.

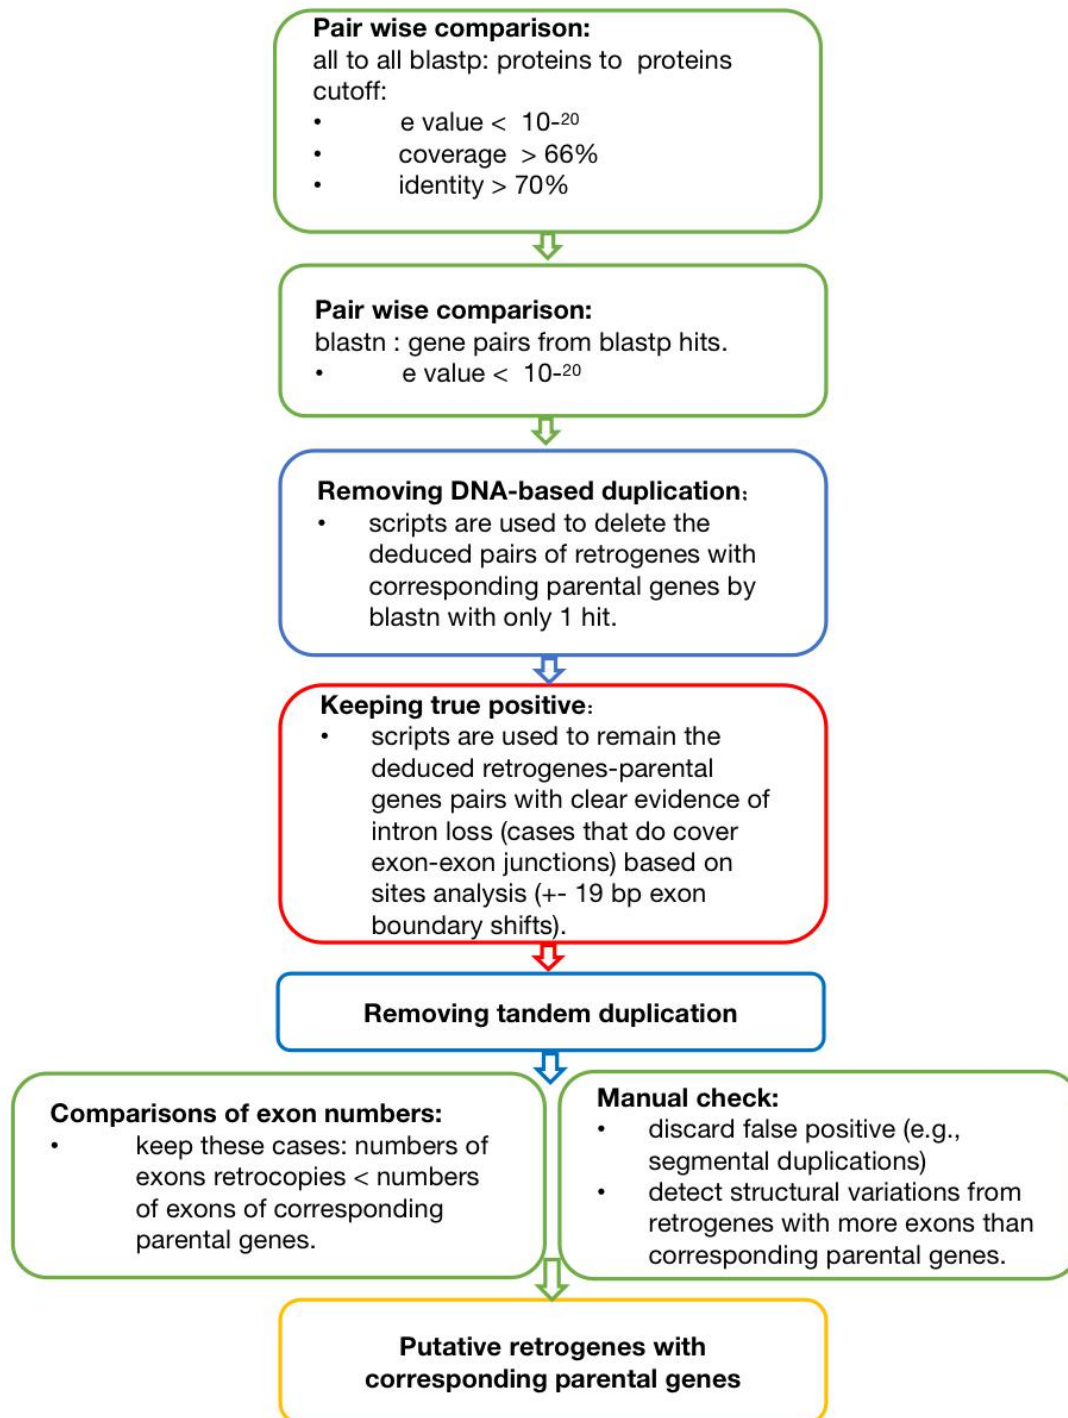

**Figure S9** Flow of retrogenes identification in the *T. arvensis* genome.

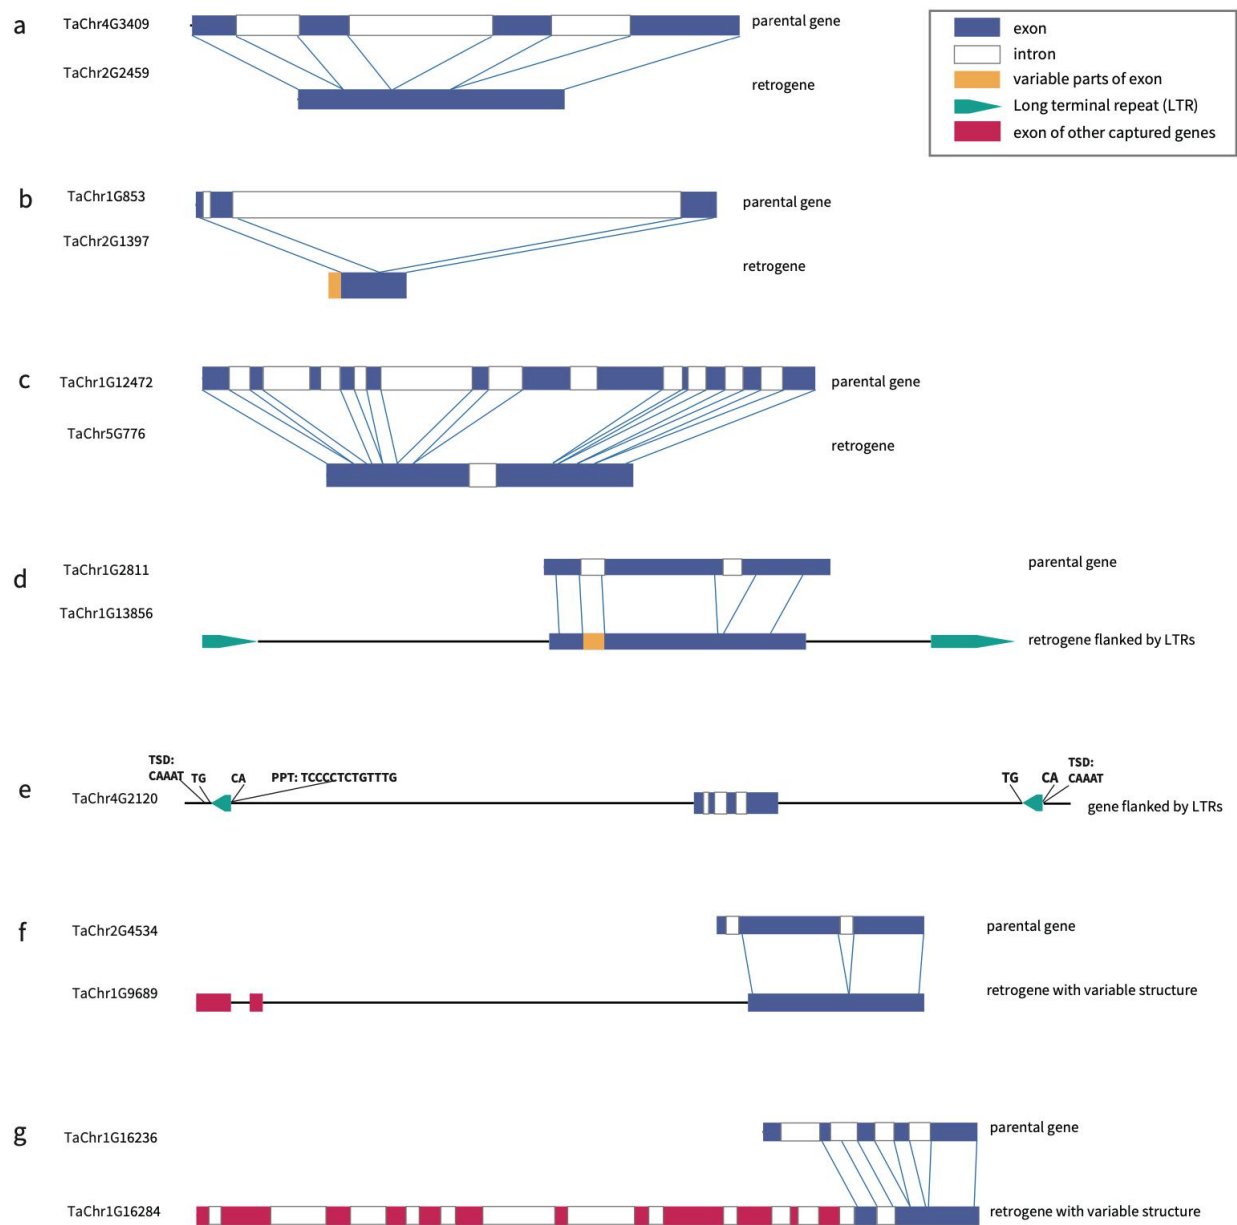

**Figure S10** Models for the emergence of retrogenes containing single or multiple exons in the *T. arvense* genome. a, Classical retrogene with one exon; b, Retrogene emergence after intron retention (the first intron of the parental gene) and with new parts of exons adding; c, Retrogene formed by exon skipping (the third exon of the parental gene) and intron retention (the seventh intron of the parental gene); d, Retrogene flanked by LTRs with a variable part of the exon; e, A gene harboring Hsp70 domain flanked by LTRs; f, A retrogene capturing two exons of other genes with unknown domain; g, A retrogene captured by an ABC transporter gene.

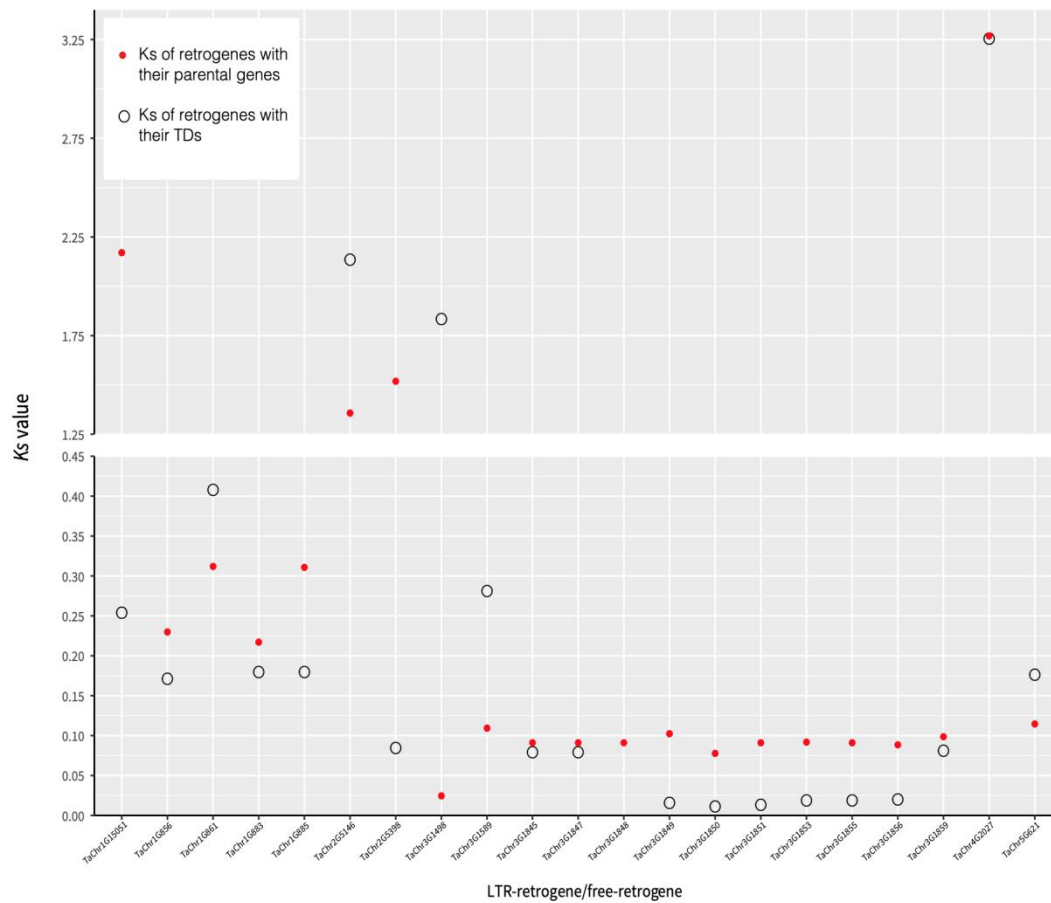

**Figure S11**  $K_s$  values of LTR-retrogenes/free-retrogenes, which are TDs themselves with their parental genes and with their TDs in SEOs which possess TDs more than 40% in *T. arvensis* genome. “TDs” indicates the tandem duplicates.

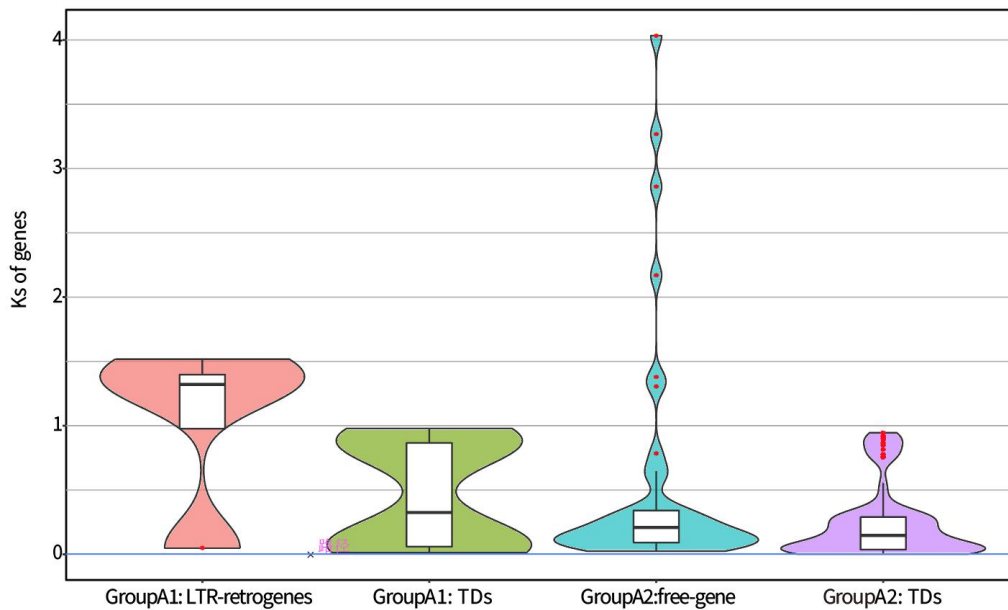

**Figure S12**  $K_s$  values of LTR-retrogenes/free-retrogenes with relevant parental genes and  $K_s$  values of all TDs in Group A1 and A2 in the *T. arvensis* genome. “TDs” indicates the tandem duplicates.

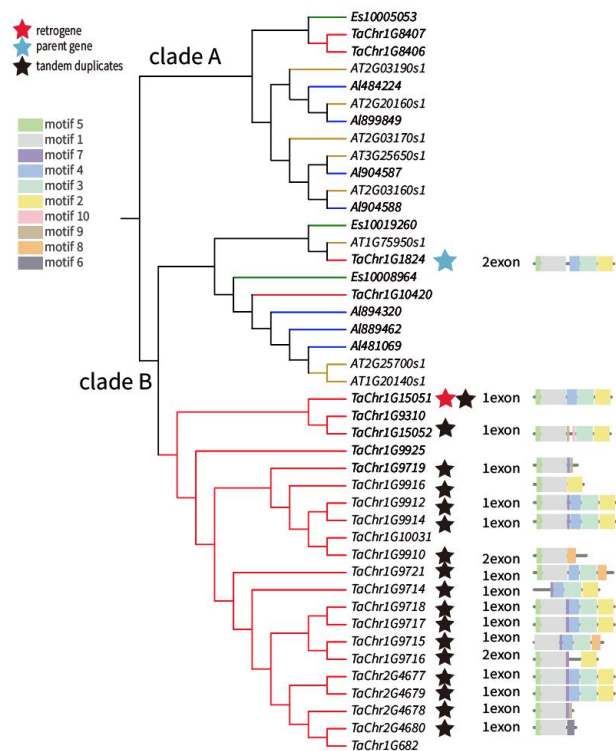

**Figure S13** The phylogenetic tree and motifs of SKP1 family in *T. arvense* (branches were colored in red), *E. salsugineum* (branches were colored in green), *A. lyrata* (branches were colored in blue), and *A. thaliana* (branches were colored in earth yellow).

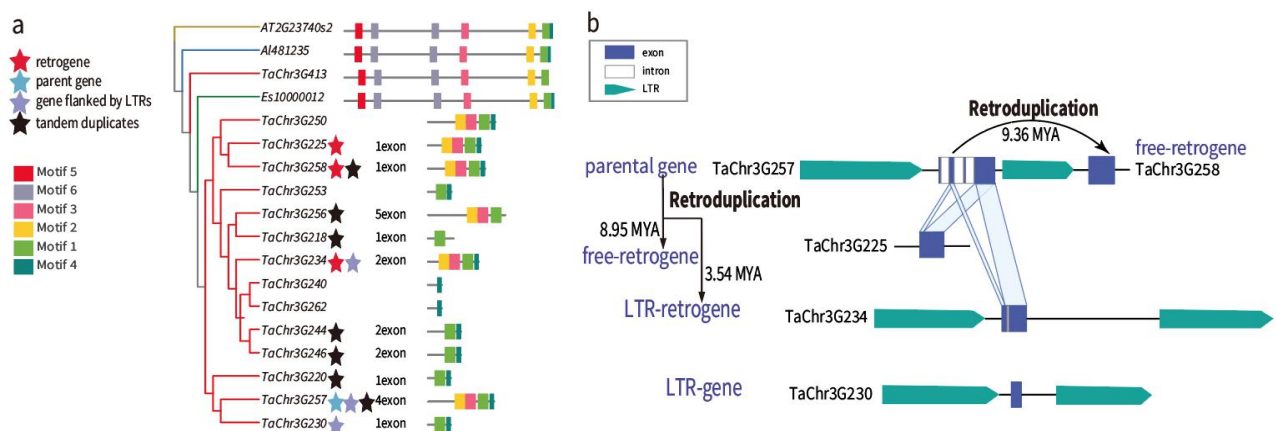

**Figure S14** SET gene family. a, the phylogenetic tree and motifs of SET family in *T. arvense* (branches were colored in red), *E. salsugineum* (branches were colored in green), *A. lyrata* (branches were colored in blue), and *A. thaliana* (branches were colored in earth yellow); b, Models for the evolution of SET gene through retroduplication.



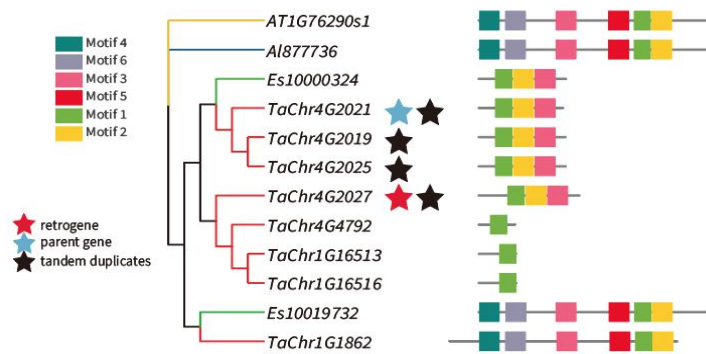

**Figure S15** The phylogenetic tree and motifs of AMP-binding (*AMPB*) family in *T. arvense* (branches were colored in red), *E. salsugineum* (branches were colored in green), *A. lyrata* (branches were colored in blue), and *A. thaliana* (branches were colored in earth yellow).

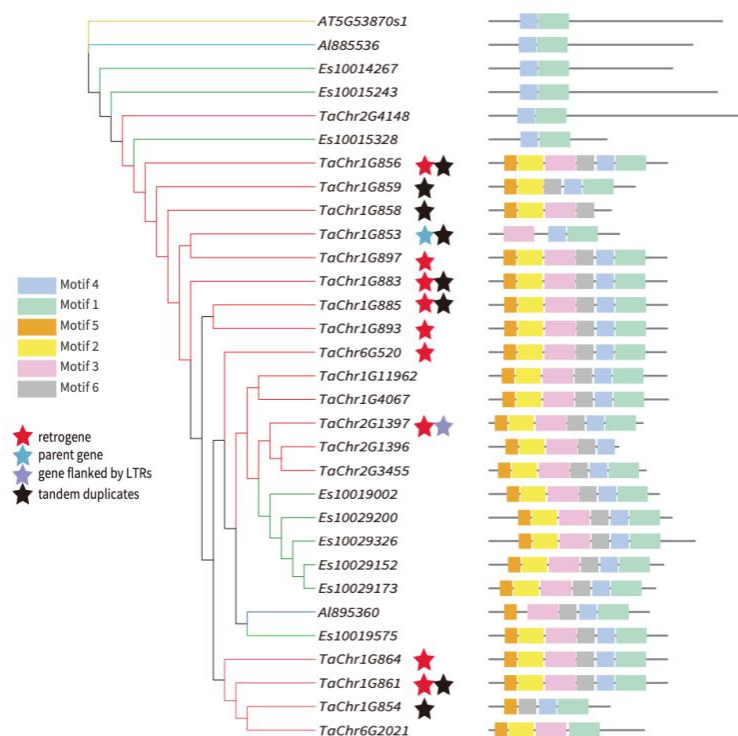

**Figure S16** The phylogenetic tree and motifs of *Cu\_bind\_like* (*PCL*) gene family in *T. arvense* (branches were colored in red), *E. salsugineum* (branches were colored in green), *A. lyrata* (branches were colored in blue), and *A. thaliana* (branches were colored in earth yellow).

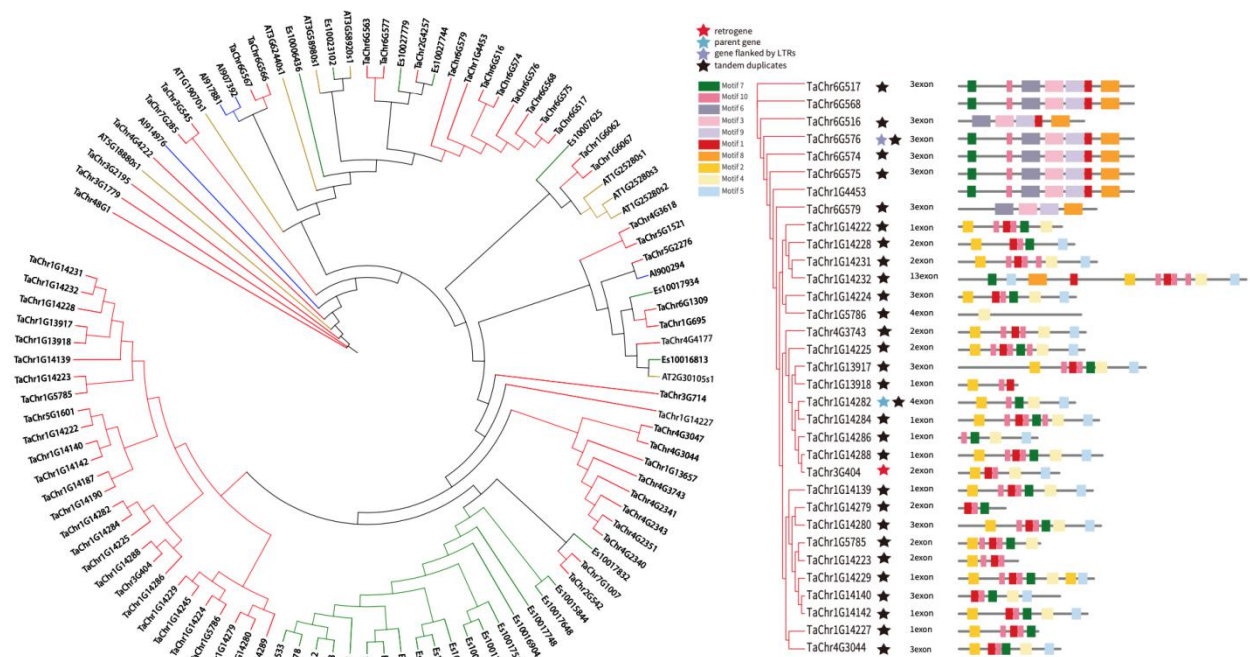

**Figure S17** The phylogenetic tree and motifs of *F-box* and leucine-rich repeat (*F-box*) gene family in *T. arvense* (branches were colored in red), *E. salsugineum* (branches were colored in green), and *A. thaliana* (branches were colored in earth yellow).

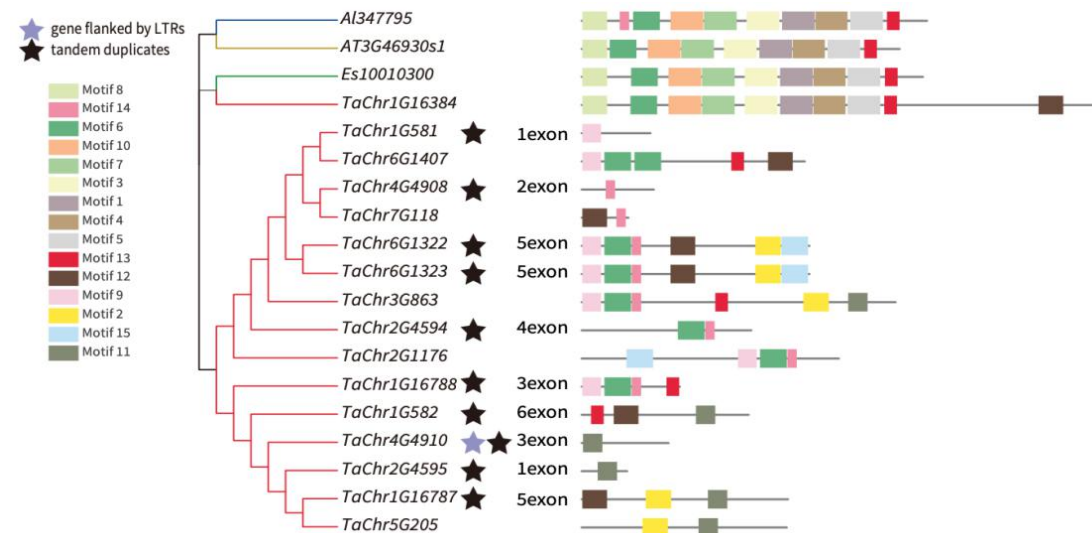

**Figure S18** The phylogenetic tree and motifs of *Cullin* gene family in *T. arvense* (branches were colored in red), *E. salsugineum* (branches were colored in green), *A. lyrata* (branches were colored in blue), and *A. thaliana* (branches were colored in earth yellow).

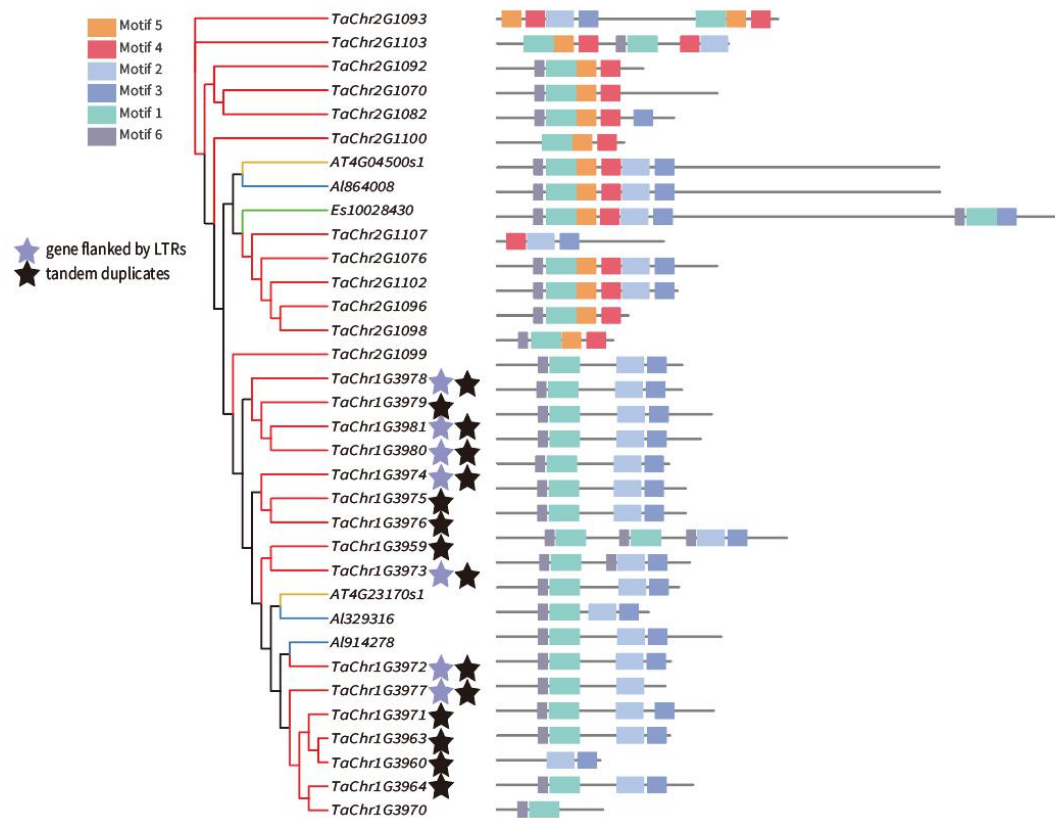

**Figure S19** The phylogenetic tree and motifs of *Cysteine-rich receptor-like kinases (CRK)* gene family in *T. arvense* (branches were colored in red), *E. salsugineum* (branches were colored in green), *A. lyrata* (branches were colored in blue), and *A. thaliana* (branches were colored in earth yellow).

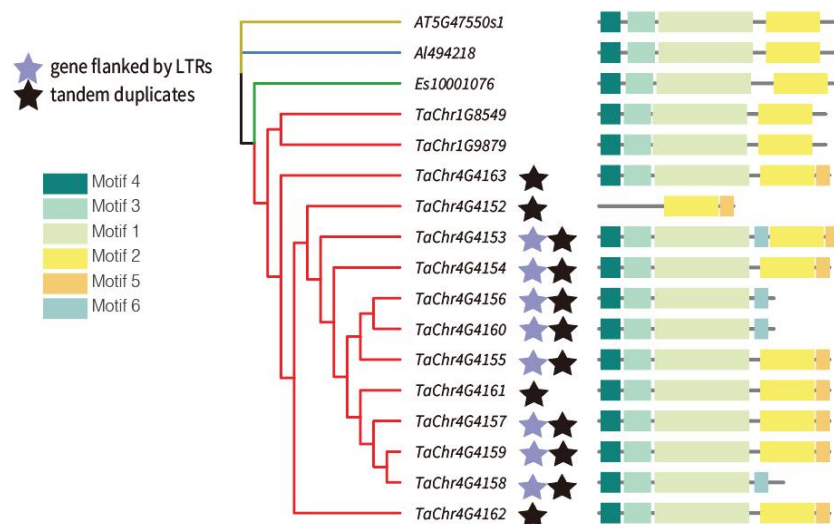

**Figure S20** The phylogenetic tree and motifs of *Aspartic proteinase inhibitors (API)* gene family in *T. arvense* (branches were colored in red), *E. salsugineum* (branches were colored in green), *A. lyrata* (branches were colored in blue), and *A. thaliana* (branches were colored in earth yellow).

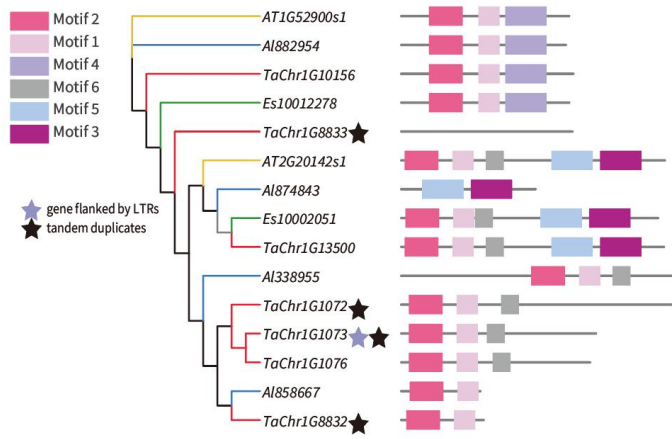

**Figure S21** The phylogenetic tree and motifs of *TIR* gene family in *T. arvense* (branches were colored in red), *E. salicorneum* (branches were colored in green), *A. lyrata* (branches were colored in blue), and *A. thaliana* (branches were colored in earth yellow).

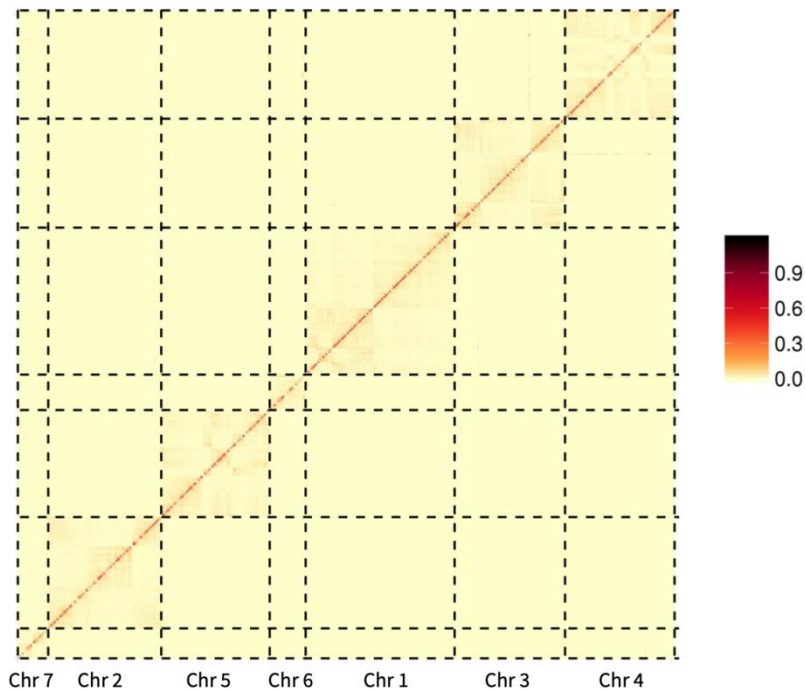

**Figure S22** Hi-C contact maps for *T. arvense* genome. Validation of Hi-C-assisted pseudochromosome assembly by calculating the thermal interaction correlation.
